# Supplementary material
Source: publisher figshare collection journal article supplement (https://tandf.figshare.com/articles/dataset/_/1018789)
Supplement: Supplementary file 1 [file 2]

Archive with 2 entries (2 files):
- UBES_A_917590_Supplement.pdf
- Final_paper_supplement.tex
