# Supplementary material
Source: publisher figshare collection journal article supplement (https://tandf.figshare.com/articles/dataset/_/1018789)
Supplement: Supplementary file 1 [file 2 › Final_paper_supplement.tex]

%2multibyte Version: 5.50.0.2953 CodePage: 936
%\let\footnote=\endnote


\documentclass[final,notitlepage,11pt]{article}
%%%%%%%%%%%%%%%%%%%%%%%%%%%%%%%%%%%%%%%%%%%%%%%%%%%%%%%%%%%%%%%%%%%%%%%%%%%%%%%%%%%%%%%%%%%%%%%%%%%%%%%%%%%%%%%%%%%%%%%%%%%%%%%%%%%%%%%%%%%%%%%%%%%%%%%%%%%%%%%%%%%%%%%%%%%%%%%%%%%%%%%%%%%%%%%%%%%%%%%%%%%%%%%%%%%%%%%%%%%%%%%%%%%%%%%%%%%%%%%%%%%%%%%%%%%%
\usepackage{rotating}
\usepackage{graphicx}
\usepackage{amsfonts}
\usepackage{amssymb}
\usepackage{amsmath}
\usepackage{latexsym}
\usepackage{endnotes}
\usepackage{longtable}

\setcounter{MaxMatrixCols}{10}
%TCIDATA{OutputFilter=LATEX.DLL}
%TCIDATA{Version=5.50.0.2953}
%TCIDATA{Codepage=936}
%TCIDATA{<META NAME="SaveForMode" CONTENT="3">}
%TCIDATA{BibliographyScheme=Manual}
%TCIDATA{Created=Wed May 15 17:28:15 2002}
%TCIDATA{LastRevised=Monday, April 21, 2014 22:08:39}
%TCIDATA{<META NAME="GraphicsSave" CONTENT="32">}
%TCIDATA{<META NAME="DocumentShell" CONTENT="General\Blank Document">}
%TCIDATA{Language=American English}
%TCIDATA{CSTFile=LaTeX article (bright).cst}
%TCIDATA{PageSetup=65,65,72,72,0}
%TCIDATA{<META NAME="PrintOptions" CONTENT="8192">}
%TCIDATA{AllPages=
%H=36
%F=29,\PARA{038<p type="texpara" tag="Body Text" > \ \ \ \ \ \ \ \ \ \ \ \ \ \ \ \ \ \ \ \ \ \ \ \ \ \ \ \ \ \ \ \ \ \ \ \ \ \ \ \ \ \ \ \ \ \ \ \ \ \ \ \ \ \ \ \ \ \ \ \ \ \ \ \ \ \ \ \ \ \ \ \ \ \ \ \ \ \ \ \ \ \ \ \ \ \ \ \ \ \ \ \ \ \ \ \ \ \ \ \ \ \ \ \ \ \ \ \ \ \ \ \ \ \ \ \ \ \ \ \ \ \ \ \ \ \ \ \ \ \ \ \ \ \ \ \ \ \ \ \ \ \ \ \ \ \ \ \ \ \ \ \ \ \ \ \ \ \ \ \ \ \ \ \ \ \ \ \ \ \ \ \ \ \ \ \ \ \ \ \ \ \ \ \ \ \ \ \ \ \ \ \ \ \ \ \ \ \ \ \ \ \ \ \ \ \ \ \ \ \ \ \ \ \ \ \ \ \ \ \ \ \ \ \ \ \ \ \ \ \ \ \ \ \ \ \ \ \ \ \ \ \ \ \ \ \ \ \ \ \ \ \ \ \ \ \ \ \ \ \ \ \ \ \ \ \ \ \ \ \ \ \ \ \ \ \ \ \ \ \ \ \ \ \ \ \ \ \ \ \ \ \ \ \ \ \  }
%}


\newtheorem{theorem}{Theorem}[section]
\newtheorem{acknowledgement}[theorem]{Acknowledgement}
\newtheorem{algorithm}[theorem]{Algorithm}
\newtheorem{axiom}[theorem]{Axiom}
\newtheorem{case}[theorem]{Case}
\newtheorem{claim}[theorem]{Claim}
\newtheorem{conclusion}[theorem]{Conclusion}
\newtheorem{condition}[theorem]{Condition}
\newtheorem{conjecture}[theorem]{Conjecture}
\newtheorem{corollary}[theorem]{Corollary}
\newtheorem{criterion}[theorem]{Criterion}
\newtheorem{definition}[theorem]{Definition}
\newtheorem{example}[theorem]{Example}
\newtheorem{exercise}[theorem]{Exercise}
\newtheorem{lemma}[theorem]{Lemma}
\newtheorem{notation}[theorem]{Notation}
\newtheorem{problem}[theorem]{Problem}
\newtheorem{proposition}[theorem]{Proposition}
\newtheorem{remark}[theorem]{Remark}
\newtheorem{solution}[theorem]{Solution}
\newtheorem{summary}[theorem]{Summary}
\newenvironment{proof}[1][Proof]{\textbf{#1.} }{\  \rule{0.5em}{0.5em}}
\textwidth=16cm
\oddsidemargin=0cm \evensidemargin=0cm
\topmargin=-20pt
\leftmargin=20pt
\numberwithin{equation}{section}
\baselineskip=100pt
\textheight=21.2cm
\def \baselinestretch{1.4}
\input{tcilatex}
\begin{document}


%TCIMACRO{\TeXButton{clearpage}{\clearpage}}%
%BeginExpansion
\clearpage%
%EndExpansion
%TCIMACRO{\TeXButton{setcounter}{\setcounter{page}{1}}}%
%BeginExpansion
\setcounter{page}{1}%
%EndExpansion
%TCIMACRO{\TeXButton{setlength}{\setlength{\baselineskip}{14pt}}}%
%BeginExpansion
\setlength{\baselineskip}{14pt}%
%EndExpansion

\begin{center}
{\Large Supplemental Material On}

\textquotedblleft \textbf{Additive Nonparametric Regression in the Presence
of Endogenous Regressors}\textquotedblright

Deniz Ozabaci,\footnote{%
Deniz Ozabaci, Dept of Economics, State Univ of New York, Binghamton, NY
13902-6000, (607) 777-2572, Fax: (607) 777-2681, e-mail:
dozabac1@binghamton.edu.} Daniel J. Henderson,\footnote{%
Daniel J. Henderson, Dept of Economics, Finance and Legal Studies, Univ of
Alabama, Tuscaloosa, AL 35487-0224, (205) 348-8991, Fax: (205) 348-0186,
e-mail: djhender@cba.ua.edu.} and Liangjun Su\footnote{%
Corresponding author: Liangjun Su, School of Economics, Singapore Management
University, 90 Stamford Road, Singapore, 178903; Tel: (65) 6828-0386;
e-mail: ljsu@smu.edu.sg.}

\ \ \ \ \ \ \ \ \ \ 
\end{center}

\setcounter{page}{1} \renewcommand\thesection{\Alph{section}} %
\setcounter{section}{3}

\noindent {\small THIS\ APPENDIX PROVIDES PROOFS FOR SOME TECHNICAL LEMMAS
IN THE ABOVE PAPER.}

$\medskip $

\noindent \textbf{Proof of Lemma B.1. }By straightforward moment
calculations, we can show that $E||Q_{n,PP}$ $-Q_{PP}||^{2}=O\left( \kappa
_{1}^{2}/n\right) $ under Assumption A1$\left( i\right) $-$\left( ii\right) $
and A2$\left( vi\right) .$ Then $\left( i\right) $ follows from Markov
inequality. By Weyl inequality [e.g., Bernstein (2005, Theorem 8.4.11)] and
the fact that $\lambda _{\max }\left( A\right) \leq \left\Vert A\right\Vert $
for any symmetric matrix $A$ (as $\left\vert \lambda _{\max }\left( A\right)
\right\vert ^{2}=\lambda _{\max }\left( AA\right) \leq \left\Vert
A\right\Vert ^{2}),$ we have%
\begin{eqnarray*}
\lambda _{\min }\left( Q_{n,PP}\right) &\leq &\lambda _{\min }\left(
Q_{PP}\right) +\lambda _{\max }\left( Q_{n,PP}-Q_{PP}\right) \\
&\leq &\lambda _{\min }\left( Q_{PP}\right) +\left\Vert
Q_{n,PP}-Q_{PP}\right\Vert =\lambda _{\min }\left( Q_{PP}\right)
+o_{P}\left( 1\right) .
\end{eqnarray*}%
Similarly, 
\begin{eqnarray*}
\lambda _{\min }\left( Q_{n,PP}\right) &\geq &\lambda _{\min }\left(
Q_{PP}\right) +\lambda _{\min }\left( Q_{n,PP}-Q_{PP}\right) \\
&\geq &\lambda _{\min }\left( Q_{PP}\right) -\left\Vert
Q_{n,PP}-Q_{PP}\right\Vert =\lambda _{\min }\left( Q_{\kappa _{1}}\right)
-o_{P}\left( 1\right) .
\end{eqnarray*}%
Analogously, we can prove the second part of $\left( ii\right) .$ Thus $%
\left( ii\right) $ follows. By the submultiplicative property of the
spectral norm, $\left( i\right) $-$\left( ii\right) $ and Assumption A2$%
\left( i\right) ,$%
\begin{eqnarray*}
\left\Vert Q_{n,PP}^{-1}-Q_{PP}^{-1}\right\Vert _{\text{sp}} &=&\left\Vert
Q_{n,PP}^{-1}\left( Q_{PP}-Q_{n,PP}\right) Q_{PP}^{-1}\right\Vert _{\text{sp}%
}\leq \left\Vert Q_{n,PP}^{-1}\right\Vert _{\text{sp}}\left\Vert
Q_{PP}-Q_{n,PP}\right\Vert _{\text{sp}}\left\Vert Q_{PP}^{-1}\right\Vert _{%
\text{sp}} \\
&=&O_{P}\left( 1\right) O_{P}\left( \kappa _{1}/n^{1/2}\right) O_{P}\left(
1\right) =O_{P}\left( \kappa _{1}/n^{1/2}\right) ,
\end{eqnarray*}%
where we use the fact that $\left\Vert Q_{n,PP}^{-1}\right\Vert _{\text{sp}}=%
\left[ \lambda _{\min }\left( Q_{n,PP}\right) \right] ^{-1}=[\lambda _{\min
}\left( Q_{PP}\right) +o_{P}\left( 1\right) ]^{-1}=O_{P}\left( 1\right) $ by 
$\left( ii\right) $ and Assumption A2$\left( i\right) .$ Then $\left(
iii\right) $ follows. The proof of $\left( iv\right) $-$\left( v\right) $ is
analogous to that of $\left( i\right) $-$\left( ii\right) $ and thus
omitted. ${\tiny \blacksquare }\medskip $

\ \ \ \ \ 

\noindent \textbf{Proof of Lemma B.2. }$\left( i\right) $ By Assumption A1$%
\left( i\right) $ and A2$\left( i\right) ,$ $E\left\Vert \xi
_{nl}\right\Vert ^{2}=n^{-2}$tr$\{\sum_{i=1}^{n}E(P_{i}P_{i}^{\prime
}U_{li}^{2})\}$ $\leq n^{-1}\left( 1+d\kappa _{1}\right) $ $\lambda _{\max
}\left( Q_{PP,U_{l}}\right) =O(\kappa _{1}/n)$. Then $\left\Vert \xi
_{nl}\right\Vert ^{2}=O_{P}(\kappa _{1}/n)$ by Markov inequality.

$\left( ii\right) $ By the facts that $\left\Vert a\right\Vert _{\text{sp}%
}^{2}=\left\Vert a\right\Vert ^{2}$ for any vector $a,$ $\left\vert
a^{\prime }b\right\vert \leq \left\Vert a\right\Vert \left\Vert b\right\Vert 
$ for any two conformable vectors $a$ and $b$ and that $\varkappa ^{\prime
}A\varkappa \leq \lambda _{\max }\left( A\right) \left\Vert \varkappa
\right\Vert ^{2}$ for any p.s.d. matrix $A$ and conformable vector $%
\varkappa ,$ Cauchy-Schwarz inequality, Lemma B.1$\left( ii\right) $ and
Assumptions A2$\left( iv\right) $, we have%
\begin{eqnarray*}
\left\Vert \zeta _{nl}\right\Vert ^{2} &=&\left\Vert \zeta _{nl}\right\Vert
_{\text{sp}}^{2}=\lambda _{\max }\left( \zeta _{nl}\zeta _{nl}^{\prime
}\right) \\
&=&\max_{\left\Vert \varkappa \right\Vert
=1}n^{-2}\sum_{i=1}^{n}\sum_{j=1}^{n}\varkappa ^{\prime }P_{i}P_{j}^{\prime
}\varkappa \left[ m_{l}\left( \mathbf{Z}_{i}\right) -P_{i}^{\prime }\mathbf{%
\alpha }_{l}\right] \left[ m_{l}\left( \mathbf{Z}_{j}\right) -P_{j}^{\prime }%
\mathbf{\alpha }_{l}\right] \\
&\leq &\max_{\left\Vert \varkappa \right\Vert =1}\left\{
n^{-1}\sum_{i=1}^{n}\left\{ \varkappa ^{\prime }P_{i}P_{i}^{\prime
}\varkappa \left[ m_{l}\left( \mathbf{Z}_{i}\right) -P_{i}^{\prime }\mathbf{%
\alpha }_{l}\right] ^{2}\right\} ^{1/2}\right\} ^{2} \\
&\leq &O_{P}(\kappa _{1}^{-2\gamma })\max_{\left\Vert \varkappa \right\Vert
=1}\left\{ n^{-1}\sum_{i=1}^{n}\varkappa ^{\prime }P_{i}P_{i}^{\prime
}\varkappa \right\} \leq O_{P}(\kappa _{1}^{-2\gamma })\lambda _{\max
}\left( Q_{n,PP}\right) =O_{P}(\kappa _{1}^{-2\gamma }).
\end{eqnarray*}

$\left( iii\right) $ Noting that $X_{li}=m_{l}\left( \mathbf{Z}_{i}\right)
+U_{li}=P_{i}^{\prime }\mathbf{\alpha }_{l}+U_{li}+\left[ m_{l}\left( 
\mathbf{Z}_{i}\right) -P_{i}^{\prime }\mathbf{\alpha }_{l}\right] ,$ by
Lemma B.1$\left( ii\right) $, w.p.a.1 we have%
\begin{eqnarray}
\mathbf{\widetilde{\alpha }}_{l}\mathbf{-\alpha }_{l} &\mathbf{=}&\left(
\sum_{i=1}^{n}P_{i}P_{i}^{\prime }\right) ^{-}\sum_{i=1}^{n}P_{i}X_{li}-%
\mathbf{\alpha }_{l}  \notag \\
&=&Q_{n,PP}^{-1}n^{-1}\sum_{i=1}^{n}P_{i}U_{li}+Q_{n,PP}^{-1}n^{-1}%
\sum_{i=1}^{n}P_{i}\left[ m_{l}\left( \mathbf{Z}_{i}\right) -P_{i}^{\prime }%
\mathbf{\alpha }_{l}\right]  \notag \\
&=&Q_{n,PP}^{-1}\xi _{nl}+Q_{n,PP}^{-1}\zeta _{nl}\equiv a_{1l}+a_{2l},\text{
say.}  \label{Al}
\end{eqnarray}%
Note that $a_{1l}=Q_{\kappa _{1}}^{-1}\xi _{nl}+r_{1nl}$ where $%
r_{1nl}=\left( Q_{n,PP}^{-1}-Q_{PP}^{-1}\right) \xi _{nl}$ satisfies that 
\begin{eqnarray*}
\left\Vert r_{1l}\right\Vert &\leq &=\left\{ \text{tr}\left[ \left(
Q_{n,PP}^{-1}-Q_{PP}^{-1}\right) \xi _{nl}\xi _{nl}^{\prime }\left(
Q_{n,PP}^{-1}-Q_{PP}^{-1}\right) \right] \right\} ^{1/2} \\
&\leq &\left\Vert \xi _{nl}\right\Vert _{\text{sp}}\left\Vert
Q_{n,PP}^{-1}-Q_{PP}^{-1}\right\Vert =O_{P}(\kappa
_{1}^{1/2}/n^{1/2})O_{P}(\kappa _{1}^{1/2}/n^{1/2})=O_{P}(\kappa _{1}/n)\ 
\end{eqnarray*}%
by Lemmas B.1$\left( iii\right) $ and B.2$\left( i\right) $. For $a_{2l},$
we have $a_{2l}=Q_{\kappa _{1}}^{-1}\zeta _{nl}+r_{2nl}$ where $%
r_{2nl}=\left( Q_{n\kappa _{1}}^{-1}-Q_{n\kappa _{1}}^{-1}\right) \zeta
_{nl} $ satisfies that 
\begin{equation*}
\left\Vert r_{2l}\right\Vert \leq \left\Vert \zeta _{nl}\right\Vert _{\text{%
sp}}\left\Vert Q_{n,PP}^{-1}-Q_{PP}^{-1}\right\Vert =O_{P}(\kappa
_{1}^{-\gamma })O_{P}(\kappa _{1}^{1/2}/n^{1/2})=O_{P}(\kappa _{1}^{-\gamma
+1/2}/n^{1/2})
\end{equation*}%
by Lemmas B.1$\left( iii\right) $ and B.2$\left( ii\right) $. The result
follows. ${\tiny \blacksquare }\medskip $

\ \ \ 

\noindent \textbf{Proof of Lemma B.3. }$\left( i\right) $ We only prove the $%
r=1$ case as the proof of the other case is almost identical. By the
definition of $\widetilde{U}_{li}$ and (\ref{Al}), we can decompose $%
\widetilde{U}_{li}-U_{li}=\left[ X_{li}-\widetilde{m}_{l}\left( \mathbf{Z}%
_{i}\right) \right] -U_{li}$ as follows 
\begin{eqnarray}
\widetilde{U}_{li}-U_{li} &=&\left( \mu _{l}-\widetilde{\mu }_{l}\right)
+\sum_{k=1}^{d_{1}}\left[ m_{l,k}\left( Z_{1k,i}\right) -\widetilde{m}%
_{l,k}\left( Z_{1k,i}\right) \right] +\sum_{k=1}^{d_{2}}\left[
m_{l,d_{1}+k}\left( Z_{2k,i}\right) -\widetilde{m}_{l,d_{1}+k}\left(
Z_{2k,i}\right) \right]   \notag \\
&=&-\left( \widetilde{\mu }_{l}-\mu _{l}\right) -\sum_{k=1}^{d_{1}}p^{\kappa
_{1}}\left( Z_{1k,i}\right) ^{\prime }\mathbb{S}_{1k}a_{1l}-%
\sum_{k=1}^{d_{2}}p^{\kappa _{1}}\left( Z_{2k,i}\right) ^{\prime }\mathbb{S}%
_{1,d_{1}+k}a_{1l}  \notag \\
&&-\sum_{k=1}^{d_{1}}p^{\kappa _{1}}\left( Z_{1k,i}\right) ^{\prime }\mathbb{%
S}_{1k}a_{2l}-\sum_{k=1}^{d_{2}}p^{\kappa _{1}}\left( Z_{2k,i}\right)
^{\prime }\mathbb{S}_{1,d_{1}+k}a_{2l}  \notag \\
&\equiv &-u_{1l,i}-u_{2l,i}-u_{3l,i}-u_{4l,i}-u_{5l,i},\text{ say.}
\label{Ul}
\end{eqnarray}%
Then by Cauchy-Schwarz inequality, $n^{-1}\sum_{i=1}^{n}(\widetilde{U}%
_{li}-U_{li})^{2}\sigma _{i}^{2}\leq
5\sum_{s=1}^{5}n^{-1}\sum_{i=1}^{n}u_{sl,i}^{2}\sigma _{i}^{2}\equiv
5\sum_{s=1}^{5}$ $V_{nl,s},$ say. Apparently, $V_{nl,1}=O_{P}\left(
n^{-1}\right) $ as $\widetilde{\mu }_{l}-\mu _{l}=O_{P}\left(
n^{-1/2}\right) .$%
\begin{eqnarray*}
V_{nl,2} &=&n^{-1}\sum_{i=1}^{n}\left( \sum_{k=1}^{d_{1}}p^{\kappa
_{1}}\left( Z_{1k,i}\right) ^{\prime }\mathbb{S}_{1k}a_{1l}\right)
^{2}\sigma _{i}^{2} \\
&\leq &d_{1}\sum_{k=1}^{d_{1}}n^{-1}\sum_{i=1}^{n}\left( p^{\kappa
_{1}}\left( Z_{1k,i}\right) ^{\prime }\mathbb{S}_{1k}a_{1l}\right)
^{2}\sigma _{i}^{2}=d_{1}\sum_{k=1}^{d_{1}}\text{tr}\left( \mathbb{S}%
_{1k}a_{1l}a_{1l}^{\prime }\mathbb{S}_{1k}^{\prime }Q_{n1k,pp}\right)  \\
&\leq &d_{1}\sum_{k=1}^{d_{1}}\lambda _{\max }\left( Q_{n1k,pp}\right) \text{%
tr}\left( a_{1l}a_{1l}^{\prime }\mathbb{S}_{1k}^{\prime }\mathbb{S}%
_{1k}\right) \leq d_{1}\sum_{k=1}^{d_{1}}\lambda _{\max }\left(
Q_{n1k,pp}\right) \left\Vert \mathbb{S}_{1k}\right\Vert _{\text{sp}%
}^{2}\left\Vert a_{1l}\right\Vert ^{2}.
\end{eqnarray*}%
where $Q_{n1k,pp}=n^{-1}\sum_{i=1}^{n}p^{\kappa _{1}}\left( Z_{1k,i}\right)
p^{\kappa _{1}}\left( Z_{1k,i}\right) ^{\prime }\sigma _{i}^{2}\ $such that $%
\lambda _{\max }(Q_{n1k,pp})=O_{P}\left( 1\right) $ by Assumption A3$\left(
ii\right) $ and arguments analogous to those used in the proof of Lemma B.1$%
\left( ii\right) $. In addition, $\left\Vert \mathbb{S}_{1k}\right\Vert _{%
\text{sp}}^{2}=\lambda _{\max }\left( \mathbb{S}_{1k}\mathbb{S}_{1k}^{\prime
}\right) =1$ and $\left\Vert a_{1l}\right\Vert ^{2}\leq \left\Vert
Q_{n,PP}^{-1}\right\Vert _{\text{sp}}^{2}\left\Vert \xi _{nl}\right\Vert
^{2}=O_{P}\left( 1\right) O_{P}(\kappa _{1}/n)=O_{P}(\kappa _{1}/n)$ by
Lemma B.1$\left( iii\right) $ and B.2$\left( i\right) $ and Assumption A2$%
\left( i\right) $. It follows that $V_{nl,2}=O_{P}\left( 1\right) \times
1\times O_{P}\left( \kappa _{1}/n\right) =O_{P}\left( \kappa _{1}/n\right) .$
Similarly, using the fact that $\left\Vert a_{2l}\right\Vert ^{2}\leq
\left\Vert Q_{n,PP}^{-1}\right\Vert _{\text{sp}}^{2}\left\Vert \zeta
_{nl}\right\Vert ^{2}=O_{P}\left( 1\right) $ $O_{P}(\kappa _{1}^{-2\gamma }),
$ we have 
\begin{eqnarray*}
V_{nl,4} &=&n^{-1}\sum_{i=1}^{n}\left( \sum_{k=1}^{d_{1}}p^{\kappa
_{1}}\left( Z_{1k,i}\right) ^{\prime }\mathbb{S}_{1k}a_{2l}\right)
^{2}\sigma _{i}^{2}\leq d_{1}\sum_{k=1}^{d_{1}}\lambda _{\max }\left(
Q_{n1k,pp}\right) \left\Vert \mathbb{S}_{1k}\right\Vert _{\text{sp}}^{2}%
\text{tr}\left( a_{2l}a_{2l}^{\prime }\right)  \\
&=&O_{P}\left( 1\right) \times 1\times O_{P}(\kappa _{1}^{-2\gamma
})=O_{P}(\kappa _{1}^{-2\gamma }).
\end{eqnarray*}%
By the same token, $V_{nl,3}=O_{P}(\kappa _{1}n^{-1})\ $and $%
V_{nl,5}=O_{P}(\kappa _{1}^{-2\gamma }).$

$\left( ii\right) $ The result follows from $\left( i\right) $ and the fact
that $\max_{1\leq i\leq n}\left\Vert \Phi _{i}\right\Vert =O_{P}\left(
\varsigma _{0\kappa }\right) $ under Assumption A2$\left( vi\right) .$

$\left( iii\right) $ By Assumption A2$\left( vi\right) ,$ Taylor expansion
and $\left( i\right) ,$%
\begin{eqnarray*}
n^{-1}\sum_{i=1}^{n}\left\Vert p^{\kappa }\left( \widetilde{U}_{li}\right)
-p^{\kappa }\left( U_{li}\right) \right\Vert ^{2}
&=&n^{-1}\sum_{i=1}^{n}\left\Vert \dot{p}^{\kappa }\left( U_{li}^{\dagger
}\right) \left( \widetilde{U}_{li}-U_{li}\right) \right\Vert ^{2} \\
&\leq &O\left( \varsigma _{1\kappa }^{2}\right) n^{-1}\sum_{i=1}^{n}\left( 
\widetilde{U}_{li}-U_{li}\right) ^{2}=O_{P}\left( \varsigma _{1\kappa
}^{2}\nu _{1n}^{2}\right) ,
\end{eqnarray*}%
where $U_{li}^{\dagger }$ lies between $\widetilde{U}_{li}$ and $U_{li}.$

$\left( iv\right) $ By Assumption A2$\left( vi\right) ,$ Taylor expansion
and triangle inequality, 
\begin{equation*}
\left\Vert n^{-1}\sum_{i=1}^{n}\left[ p^{\kappa }\left( \widetilde{U}%
_{li}\right) -p^{\kappa }\left( U_{li}\right) \right] \Phi _{i}^{\prime
}\right\Vert _{\text{sp}}
\end{equation*}
is bounded by $\left\Vert n^{-1}\sum_{i=1}^{n}\dot{p}^{\kappa }\left(
U_{li}\right) \Phi _{i}^{\prime }\left( \widetilde{U}_{li}-U_{li}\right)
\right\Vert _{\text{sp}}+\frac{1}{2}\left\Vert n^{-1}\sum_{i=1}^{n}\ddot{p}%
^{\kappa }\left( U_{li}^{\ddagger }\right) \Phi _{i}^{\prime }\left( 
\widetilde{U}_{li}-U_{li}\right) ^{2}\right\Vert _{\text{sp}}$ $\equiv
T_{nl,1}+T_{nl,2},$ where $U_{li}^{\ddagger }$ lies between $\widetilde{U}%
_{li}$ and $U_{li}.$ By triangle and Cauchy-Schwarz inequalities and $\left(
ii\right) ,$ 
\begin{eqnarray*}
T_{nl,1} &\leq &n^{-1}\sum_{i=1}^{n}\left\Vert \dot{p}^{\kappa }\left(
U_{li}\right) \right\Vert _{\text{sp}}\left\Vert \Phi _{i}^{\prime }\left( 
\widetilde{U}_{li}-U_{li}\right) \right\Vert _{\text{sp}} \\
&\leq &\left\{ n^{-1}\sum_{i=1}^{n}\left\Vert \dot{p}^{\kappa }\left(
U_{li}\right) \right\Vert ^{2}\right\} ^{1/2}\left\{
n^{-1}\sum_{i=1}^{n}\left\Vert \Phi _{i}\right\Vert ^{2}\left\vert 
\widetilde{U}_{li}-U_{li}\right\vert ^{2}\right\} ^{1/2} \\
&=&O_{P}\left( \kappa ^{1/2}\right) O_{P}\left( \varsigma _{0\kappa }\nu
_{1n}\right) =O_{P}\left( \kappa ^{1/2}\varsigma _{0\kappa }\nu _{1n}\right)
.
\end{eqnarray*}%
By triangle inequality and $\left( i\right) ,$ $T_{nl,2}\leq O\left(
\varsigma _{0\kappa }\varsigma _{2\kappa }\right) n^{-1}\sum_{i=1}^{n}(%
\widetilde{U}_{li}-U_{li})^{2}$ $=O_{P}(\varsigma _{0\kappa }\varsigma
_{2\kappa }\nu _{1n}^{2})$. Then $\left( iv\right) $ follows.

$\left( v\right) $ Let $\Gamma _{nl}\equiv \lbrack p^{\kappa }(\widetilde{U}%
_{l1})-p^{\kappa }\left( U_{l1}\right) ,...,[p^{\kappa }(\widetilde{U}%
_{ln})-p^{\kappa }\left( U_{ln}\right) ]]^{\prime }$ and $\mathbf{e}%
=(e_{1},...,e_{n})^{\prime }.$ Then we can write $n^{-1}\sum_{i=1}^{n}[p^{%
\kappa }(\widetilde{U}_{li})-p^{\kappa }\left( U_{li}\right) ]e_{i}$ as $%
n^{-1}\Gamma _{nl}^{\prime }\mathbf{e.}$ Let $\mathbb{D}_{n}\equiv \left\{
\left( \mathbf{X}_{i},\mathbf{Z}_{i},\mathbf{U}_{i}\right) \right\}
_{i=1}^{n}.$ By the law of iterated expectations, Taylor expansion,
Assumptions A1$\left( i\right) ,$ A3$\left( ii\right) $ and A2$\left(
vi\right) $ and $\left( i\right) $ 
\begin{eqnarray*}
E\left\{ \left\Vert n^{-1}\Gamma _{nl}^{\prime }\mathbf{e}\right\Vert ^{2}|%
\mathbb{D}_{n}\right\} &=&n^{-2}E\left[ \text{tr}\left( \Gamma _{n}^{\prime }%
\mathbf{ee}^{\prime }\Gamma _{n}\right) \right] =n^{-2}E\left[ \text{tr}%
\left( \Gamma _{n}^{\prime }E\left( \mathbf{ee}^{\prime }|\mathbb{D}%
_{n}\right) \Gamma _{n}\right) \right] \\
&=&n^{-2}\sum_{i=1}^{n}[p^{\kappa }(\widetilde{U}_{li})-p^{\kappa }\left(
U_{li}\right) ]^{2}\sigma _{i}^{2} \\
&\leq &O_{P}\left( \varsigma _{1\kappa }\right) n^{-2}\sum_{i=1}^{n}\left( 
\widetilde{U}_{li}-U_{li}\right) ^{2}\sigma _{i}^{2}=O_{P}\left(
n^{-1}\varsigma _{1\kappa }^{2}\nu _{1n}^{2}\right) .
\end{eqnarray*}%
It follows that $\left\Vert n^{-1}\Gamma _{nl}^{\prime }\mathbf{e}%
\right\Vert =O_{P}\left( n^{-1/2}\varsigma _{1\kappa }\nu _{1n}\right) $ by
the conditional Chebyshev inequality. ${\tiny \blacksquare }\medskip $

\ \ \ \ 

\noindent \textbf{Proof of Lemma B.4. }$\left( i\right) $ Noting that $%
n^{-1}\sum_{i=1}^{n}\left\Vert \widetilde{\Phi }_{i}-\Phi _{i}\right\Vert
^{2}=\sum_{l=1}^{d_{x}}n^{-1}\sum_{i=1}^{n}\left\Vert p^{\kappa }\left( 
\widetilde{U}_{li}\right) -p^{\kappa }\left( U_{li}\right) \right\Vert ^{2},$
the result follows from Lemma B.3$\left( iii\right) $.

$\left( ii\right) $ Noting that $\left\Vert n^{-1}\sum_{i=1}^{n}\left( 
\widetilde{\Phi }_{i}-\Phi _{i}\right) \Phi _{i}^{\prime }\right\Vert
^{2}=\sum_{l=1}^{d_{x}}\left\Vert n^{-1}\sum_{i=1}^{n}\left[ p^{\kappa
}\left( \widetilde{U}_{li}\right) -p^{\kappa }\left( U_{li}\right) \right]
\Phi _{i}^{\prime }\right\Vert ^{2},$ the result follows from Lemma B.3$%
\left( iv\right) $.

$\left( iii\right) $ Noting that $\widetilde{Q}_{n,\Phi \Phi }-Q_{n,\Phi
\Phi }=n^{-1}\sum_{i=1}^{n}(\widetilde{\Phi }_{i}\widetilde{\Phi }%
_{i}^{\prime }-\Phi _{i}\Phi _{i}^{\prime })=n^{-1}\sum_{i=1}^{n}(\widetilde{%
\Phi }_{i}-\Phi _{i})(\widetilde{\Phi }_{i}-\Phi _{i})^{\prime }$ $%
+n^{-1}\sum_{i=1}^{n}(\widetilde{\Phi }_{i}$ $-\Phi _{i})\Phi _{i}^{\prime
}+n^{-1}\sum_{i=1}^{n}\Phi _{i}(\widetilde{\Phi }_{i}-\Phi _{i})^{\prime },$
the result follows from $\left( i\right) $-$\left( ii\right) $ and the
triangle inequality.

$\left( iv\right) $ By the triangle inequality $\left\Vert \widetilde{Q}%
_{n,\Phi \Phi }^{-1}-Q_{\Phi \Phi }^{-1}\right\Vert _{\text{sp}}\leq
\left\Vert \widetilde{Q}_{n,\Phi \Phi }^{-1}-Q_{n,\Phi \Phi
}^{-1}\right\Vert _{\text{sp}}+\left\Vert Q_{n,\Phi \Phi }^{-1}-Q_{\Phi \Phi
}^{-1}\right\Vert _{\text{sp}}.$ Arguments like those used in the proof of
Lemma B.1(ii) show that $\left\Vert \widetilde{Q}_{n,\Phi \Phi
}^{-1}\right\Vert _{\text{sp}}=\left[ \lambda _{\min }\left( \widetilde{Q}%
_{n,\Phi \Phi }\right) \right] ^{-1}$ $=\left[ \lambda _{\min }\left(
Q_{\Phi \Phi }\right) +o_{P}\left( 1\right) \right] ^{-1}=O_{P}\left(
1\right) $ where the second equality follows from $\left( iii\right) $ and
Lemma B.1$(ii).$ By the submultiplicative property of the spectral norm and $%
\left( iii\right) $, 
\begin{eqnarray*}
\left\Vert \widetilde{Q}_{n,\Phi \Phi }^{-1}-Q_{n,\Phi \Phi
}^{-1}\right\Vert _{\text{sp}} &=&\left\Vert \widetilde{Q}_{n,\Phi \Phi
}^{-1}\left( \widetilde{Q}_{n,\Phi \Phi }-\widetilde{Q}_{n,\Phi \Phi
}\right) Q_{n,\Phi \Phi }^{-1}\right\Vert _{\text{sp}} \\
&\leq &\left\Vert \widetilde{Q}_{n,\Phi \Phi }^{-1}\right\Vert _{\text{sp}%
}\left\Vert \widetilde{Q}_{n,\Phi \Phi }-\widetilde{Q}_{n,\Phi \Phi
}\right\Vert _{\text{sp}}\left\Vert Q_{n,\Phi \Phi }^{-1}\right\Vert _{\text{%
sp}} \\
&=&O_{P}\left( \kappa ^{1/2}\varsigma _{0\kappa }\nu _{1n}+\varsigma
_{0\kappa }\varsigma _{2\kappa }\nu _{1n}^{2}\right) .
\end{eqnarray*}%
Similarly, $\left\Vert Q_{n,\Phi \Phi }^{-1}-Q_{\Phi \Phi }^{-1}\right\Vert
_{\text{sp}}=O_{P}\left( \kappa /n^{1/2}\right) $ by Lemma B.1$\left(
iii\right) .$ It follows that\ $\left\Vert \widetilde{Q}_{n,\Phi \Phi
}^{-1}-Q_{\Phi \Phi }^{-1}\right\Vert _{\text{sp}}$ $=O_{P}\left( \kappa
^{1/2}\varsigma _{0\kappa }\nu _{1n}+\varsigma _{0\kappa }\varsigma
_{2\kappa }\nu _{1n}^{2}\right) .$

$\left( v\right) $ Noting that $\left\Vert n^{-1}\sum_{i=1}^{n}\left( 
\widetilde{\Phi }_{i}-\Phi _{i}\right) e_{i}\right\Vert
^{2}=\sum_{l=1}^{d_{x}}\left\Vert n^{-1}\sum_{i=1}^{n}\left[ p^{\kappa
}\left( \widetilde{U}_{li}\right) -p^{\kappa }\left( U_{li}\right) \right]
e_{i}\right\Vert ^{2},$ the result follows from Lemma B.3$\left( v\right) $.

$\left( vi\right) $ Let $\delta _{i}\equiv \bar{g}\left(
X_{i},Z_{1i},U_{i}\right) -\Phi _{i}^{\prime }\mathbf{\beta .}$ By triangle
inequality, Assumption A2$\left( v\right) $, Jensen inequality and $\left(
i\right) ,$ we have $\left\Vert n^{-1}\sum_{i=1}^{n}\left( \widetilde{\Phi }%
_{i}-\Phi _{i}\right) \delta _{i}\right\Vert \leq O_{P}\left( \kappa
^{-\gamma }\right) n^{-1}\sum_{i=1}^{n}\left\Vert \widetilde{\Phi }_{i}-\Phi
_{i}\right\Vert =O_{P}\left( \kappa ^{-\gamma }\right) $ $O_{P}\left(
\varsigma _{1\kappa }\nu _{1n}\right) $ $=O_{P}\left( \kappa ^{-\gamma
}\varsigma _{1\kappa }\nu _{1n}\right) .$\ ${\tiny \blacksquare }\medskip $

\ \ \ \ 

\noindent \textbf{Proof of Lemma B.5. }The proof of $\left( i\right) $-$%
\left( ii\right) $ is analogous to that of Lemma B.2$\left( i\right) $-$%
\left( ii\right) ,$ respectively. Noting that $\left\Vert Q_{\Phi \Phi
}^{-1}\right\Vert _{\text{sp}}=O\left( 1\right) $ by Assumption A2$\left(
ii\right) $, we can prove $\left( iii\right) $ by showing that $\left\Vert
T_{nl}\right\Vert =O_{P}(\nu _{1n}),$ where $T_{nl}=n^{-1}\sum_{i=1}^{n}\Phi
_{i}\delta _{li}(\widetilde{U}_{li}-U_{li})$ where $\delta _{li}=\dot{p}%
^{\kappa }\left( U_{li}\right) ^{\prime }\mathbf{\beta }_{d_{x}+d_{1}+l}.$
By triangle inequality and Assumptions A1$\left( ii\right) $ and A2$\left(
iii\right) $ and $\left( v\right) $%
\begin{eqnarray*}
c_{\delta _{l}} &\equiv &\max_{1\leq i\leq n}\left\Vert \delta
_{li}\right\Vert \leq \sup_{u_{l}\in \mathcal{U}_{l}}\left\Vert \dot{g}%
_{d_{x}+d_{1}+l}\left( u_{l}\right) -\dot{p}^{\kappa }\left( u_{l}\right)
^{\prime }\mathbf{\beta }_{d_{x}+d_{1}+l}\right\Vert +\sup_{u_{l}\in 
\mathcal{U}_{l}}\left\Vert \dot{g}_{d_{x}+d_{1}+l}\left( u_{l}\right)
\right\Vert  \\
&=&O\left( \kappa ^{-\gamma }\right) +O\left( 1\right) =O\left( 1\right) .
\end{eqnarray*}%
By (\ref{Ul}), $T_{nl}=n^{-1}\sum_{i=1}^{n}\Phi _{i}\delta _{li}(\widetilde{U%
}_{li}-U_{li})=\sum_{s=1}^{5}n^{-1}\sum_{i=1}^{n}\Phi _{i}\delta
_{li}u_{sl,i}=\sum_{s=1}^{5}T_{nl,s},$ say.

Let $\eta _{nlk}\equiv n^{-1}\sum_{i=1}^{n}\delta _{li}\Phi _{i}p^{\kappa
_{1}}\left( Z_{1k,i}\right) ^{\prime }$ and $\bar{\eta}_{lk}=E\left( \eta
_{nlk}\right) .$ Then $\left\Vert \eta _{nlk}-\bar{\eta}_{lk}\right\Vert
=O_{P}(\left( \kappa \kappa _{1}/n\right) ^{1/2})$ by Chebyshev inequality
and 
\begin{equation*}
\left\Vert \bar{\eta}_{k}\right\Vert _{\text{sp}}^{2}=\left\Vert E\left[
\delta _{li}\Phi _{i}p^{\kappa _{1}}\left( Z_{1k,i}\right) ^{\prime }\right]
\right\Vert _{\text{sp}}^{2}\leq c_{\delta }^{2}\lambda _{\max }\left(
M\right) =O\left( 1\right) ,
\end{equation*}%
where $M\equiv E\left[ \Phi _{i}p^{\kappa _{1}}\left( Z_{1k,i}\right)
^{\prime }\right] E\left[ p^{\kappa _{1}}\left( Z_{1k,i}\right) \Phi
_{i}^{\prime }\right] $ and we use the fact that $M$ has bounded largest
eigenvalue. To see the last point, first note that for $\kappa _{1}\leq
\kappa ,$ $E\left[ \Phi _{i}p^{\kappa _{1}}\left( Z_{1k,i}\right) ^{\prime }%
\right] $ is a submatrix of $A\equiv E\left( \Phi _{i}\Phi _{i}^{\prime
}\right) $ which has bounded largest eigenvalue. Partition $A$ as follows 
\begin{equation*}
A=\left[ 
\begin{array}{ccc}
A_{11} & A_{12} & A_{13} \\ 
A_{21} & A_{22} & A_{23} \\ 
A_{31} & A_{32} & A_{33}%
\end{array}%
\right]
\end{equation*}%
where $A_{ij}=A_{ji}^{\prime }$ for $i,$ $j=1,2,3$ and $E\left[ \Phi
_{i}p^{\kappa _{1}}\left( Z_{1k,i}\right) ^{\prime }\right] =\left[ 
\begin{array}{ccc}
A_{12}^{\prime } & A_{22} & A_{32}^{\prime }%
\end{array}%
\right] ^{\prime }.$ Then 
\begin{equation*}
M=\left[ 
\begin{array}{ccc}
A_{12}A_{12}^{\prime } & A_{12}A_{22} & A_{12}A_{32}^{\prime } \\ 
A_{22}A_{12}^{\prime } & A_{22}A_{22} & A_{22}A_{32}^{\prime } \\ 
A_{32}A_{12}^{\prime } & A_{32}A_{22} & A_{32}A_{32}^{\prime }%
\end{array}%
\right] .
\end{equation*}%
By Thompson and Freede (1970, Theorem 2), $\lambda _{\max }\left( M\right)
\leq \lambda _{\max }\left( A_{12}A_{12}^{\prime }\right) +\lambda _{\max
}\left( A_{22}A_{22}^{\prime }\right) +\lambda _{\max }\left(
A_{32}A_{32}^{\prime }\right) .$ By Fact 8.9.3 in Bernstein (2005), the
positive definiteness of $A$ ensures that both $A_{12}A_{12}^{\prime }$ and $%
A_{32}A_{32}^{\prime }$ have finite maximum eigenvalues as both $\left[ 
\begin{array}{cc}
A_{11} & A_{12} \\ 
A_{21} & A_{22}%
\end{array}%
\right] $ and $\left[ 
\begin{array}{cc}
A_{22} & A_{23} \\ 
A_{32} & A_{33}%
\end{array}%
\right] $ are also positive definite. In addition, $\lambda _{\max }\left(
A_{22}A_{22}\right) =\left[ \lambda _{\max }\left( A_{22}\right) \right]
^{2} $ is finite as $A$ has bounded maximum eigenvalue. It follows that $%
\lambda _{\max }\left( M\right) =O\left( 1\right) .$ Consequently, $%
\left\Vert \eta _{nlk}\right\Vert =O_{P}(1+\left( \kappa \kappa
_{1}/n\right) ^{1/2})=O_{P}\left( 1\right) .$

Analogously, noting that $1$ is the first element of $\Phi _{i},$ we can
show that $\left\Vert n^{-1}\sum_{i=1}^{n}\Phi _{i}\delta _{i}\right\Vert _{%
\text{sp}}=O_{P}(1+\left( \kappa /n\right) ^{1/2})$ $=O_{P}\left( 1\right) .$
It follows that 
\begin{eqnarray*}
\left\Vert T_{nl,1}\right\Vert &=&\left\Vert n^{-1}\sum_{i=1}^{n}\Phi
_{i}\delta _{li}\right\Vert _{\text{sp}}\left\vert \widetilde{\mu }_{l}-\mu
_{l}\right\vert =O_{P}\left( 1\right) O_{P}\left( n^{-1/2}\right)
=O_{P}\left( n^{-1/2}\right) , \\
\left\Vert T_{nl,2}+T_{nl,4}\right\Vert &\leq &\sum_{k=1}^{d_{1}}\left\Vert
\eta _{nlk}\right\Vert \left\Vert \mathbb{S}_{1k}\right\Vert _{\text{sp}%
}\left( \left\Vert a_{1l}\right\Vert +\left\Vert a_{2l}\right\Vert \right)
=O_{P}\left( 1\right) O\left( 1\right) O(\nu _{1n})=O(\nu _{1n}),
\end{eqnarray*}%
and $\left\Vert T_{nl,3}+T_{nl,5}\right\Vert =O(\nu _{1n})\ $by the same
token. Thus we have shown that $\left\Vert T_{nl}\right\Vert =O_{P}(\nu
_{1n}).$ ${\tiny \blacksquare }\medskip $

\ \ \ 

\noindent \textbf{References}\setlength{\baselineskip}{9pt}

\begin{description}
\item Bernstein, D. S. (2005), \textit{Matrix Mathematics: Theory, Facts and
Formulas with Application to Linear Systems Theory,} Princeton: Princeton
University Press.

\item Thompson, R., and Freede, L. J. (1974), \textquotedblleft Eigenvalues
of Partitioned Hermitian Matrices,\textquotedblright\ \textit{Bulletin
Australian Mathematical Society,} 3, 23-37.
\end{description}

\end{document}
